# Supplementary material for: Sociodemographic and Ocular Factors Associated with Glaucoma ER Care: A Retrospective Analysis from an Eye Emergency Room
Source: Research Square preprint supplement (doi:10.21203/rs.3.rs-4183734/v1), 2024-06-20
Supplement: Supplementary file 1 [file 03a4293c398637d29fd4ac57.docx]

**Table 1:** Baseline Patient Characteristics and Demographics

means reported as mean SD; medians reported as median (range); percentages reported as n(%)

VA reported as mean SD; IOP and CDR reported as median (range); n = 192

| **General Demographics** | |  | **Clinical Characteristics on ER Exam** | |
| --- | --- | --- | --- | --- |
| Age | 60.5 15.8 |  | VA Worse Eye | 1.31 1.05 |
| % Female | 102 (53.1%) |  | VA Better Eye | 0.35 0.53 |
| RUCA score | 1.1 0.5 |  | IOP Worse Eye | 28.5 (3-87) |
| ADI National %tile | 59.4 26.9 |  | IOP Better Eye | 20 (6-68) |
|  |  |  | CDR Worse Eye | 0.8 (0.1-1.0) |
| **Race/Ethnicity** | |  | CDR Better Eye | 0.6 (0.1-1.0) |
| Black | 85 (44.3%) |  | Unilateral or Bilateral Legal Blindness | 92 (47.9%) |
| White | 59 (30.7%) |  |  |  |
| Hispanic | 22 (11.5%) |  | **RUCA score** | |
| Asian | 14 (7.3%) |  | Micropolitan | 183 (95.3%) |
| Unspecified | 12 (6.2%) |  | Metropolitan | 9 (4.7%) |
|  |  |  |  |  |
| **Primary Language Spoken** | |  |  |  |
| English | 178 (92.7%) |  |  |  |
| Non-English | 14 (7.3%) |  |  |  |
|  |  |  |  | |
| **Insurance Status** | |  |  |  |
| Uninsured | 31 (16.2%) |  |  |  |
| Insured | 161 (83.8%) |  |  |  |
|  |  |  |  |  |
| **New Diagnosis at Wills ER** | |  |  |  |
| No | 32 (16.7%) |  |  |  |
| Yes | 76 (39.6%) |  |  |  |
| Unspecified | 84 (43.8%) |  |  |  |
|  |  |  |  |  |
| **Followed Up at Wills in 30 Days** | |  |  |  |
| No | 70 (36.5%) |  |  |  |
| Yes | 122 (63.5%) |  |  |  |
|  |  |  |  |  |
| **Type of Glaucoma at Wills ER** | |  |  |  |
| POAG | 52 (27.1%) |  |  |  |
| AACG | 33 (17.2%) |  |  |  |
| NVG | 25 (13.0%) |  |  |  |
| PACS/PAC/PACG | 22 (11.5%) |  |  |  |
| Uveitic | 21 (10.9%) |  |  |  |
| Other | 39 (20.3%) |  |  |  |

ER: emergency room; RUCA: rural urban commuting area; ADI: area deprivation index;

POAG: primary open angle glaucoma; AACG: acute angle closure glaucoma; NVG: neovascular glaucoma;

PACS: primary angle closure suspect; PAC: primary angle closure; PACG: primary angle closure glaucoma;

VA: visual acuity; IOP: intraocular pressure; CDR: cup-to-disc ratio; BCVA: best corrected visual acuity
