# Supplementary material for: Sociodemographic and Ocular Factors Associated with Glaucoma ER Care: A Retrospective Analysis from an Eye Emergency Room
Source: Research Square preprint supplement (doi:10.21203/rs.3.rs-4183734/v1), 2024-06-20
Supplement: Supplementary file 2 [file 08b57d4d36ac5a1abce61c7a.docx]

**Table 2:** Characteristics Associated with New Definite or Suspected Glaucoma Diagnosis in the ER

means reported as mean SD; medians reported as median (range); percentages reported as n(%)

VA reported as mean SD; IOP and CDR reported as median (range)

| **Category** | **Diagnosed in ER**  **(n = 76)** | **Previous Diagnosis**  **(n = 32)** | **P-value** |
| --- | --- | --- | --- |
|  |  |  |  |
| **Demographics** | | | |
| Age | 57.8 15.1 | 58.5 15.7 | 0.831 |
| % Female | 40 (52.6%) | 19 (59.4%) | 0.535 |
| RUCA Score | 1.2 0.7 | 1.0 | **0.016** |
| ADI (National Percentile) | 58 26.3 | 64.7 27.5 | 0.259 |
| Metropolitan RUCA | 69 (90.8%) | 32 (100%) | 0.102 |
| Micropolitan RUCA | 7 (9.2%) | 0 (0%) |
| Followed Up in 30 Days | 48 (63.2%) | 15 (46.9%) | 0.138 |
|  |  |  |  |
| **Race/Ethnicity: n(%)** | | | |
| Black | 29 (38.2%) | 18 (56.3%) | **0.025** |
| White | 29 (38.2%) | 3 (9.4%) |
| Hispanic | 6 (7.9%) | 6 (18.8%) |
| Asian | 7 (9.2%) | 4 (12.5%) |
| Unspecified Race | 5 (6.6%) | 1 (3.1%) |
|  |  |  |  |
| **Primary Language: n(%)** | | | |
| English | 73 (96.1%) | 30 (93.8%) | 0.632 |
| Non-English | 3 (3.9%) | 2 (6.3%) |
|  |  |  |  |
| **Clinical Characteristics on ER Exam** | | | |
| VA Worse Eye | 1.19 0.99 | 1.4 1.19 | 0.399 |
| VA Better Eye | 0.27 0.36 | 0.22 0.39 | 0.488 |
| IOP Worse Eye | 37 (5-68) | 24.5 (3-87) | 0.182 |
| IOP Better Eye | 17 (6-68) | 20 (9-54) | 0.262 |
| CDR Worse Eye | 0.4 (0.1-1.0) | 0.9 (0.4-1.0) | **0.023** |
| CDR Better Eye | 0.4 (0.1-1.0) | 0.7 (0.4-1.0) | **0.011** |
|  |  |  |  |
| **Low Vision: n(%)** | | | |
| No Low Vision | 53 (69.7%) | 27 (84.4%) | 0.360 |
| BCVA < 20/40 | 10 (13.2%) | 1 (3.1%) |
| BCVA < 20/60 | 9 (11.8%) | 3 (9.4%) |
| BCVA < 20/200 | 4 (5.3%) | 1 (3.1%) |
|  |  |  |  |
| **Blindness: n(%)** | | | |
| No blindness | 41 (53.9%) | 15 (46.9%) | 0.601 |
| 1 eye < 20/200 | 31 (40.8%) | 16 (50.0%) |
| Both eyes < 20/200 | 4 (5.3%) | 1 (3.1%) |

ER: emergency room; RUCA: rural urban commuting area; ADI: area deprivation index;

VA: visual acuity; IOP: intraocular pressure; CDR: cup-to-disc ratio; BCVA: best corrected visual acuity
