# Supplementary material for: Sociodemographic and Ocular Factors Associated with Glaucoma ER Care: A Retrospective Analysis from an Eye Emergency Room
Source: Research Square preprint supplement (doi:10.21203/rs.3.rs-4183734/v1), 2024-06-20
Supplement: Supplementary file 3 [file 26ca96323e7cc79ab1f64418.docx]

**Table 3:** Characteristics Associated with Need for Urgent Surgical Intervention after ER Visit

means reported as mean SD; medians reported as median (range); percentages reported as n(%)

VA reported as mean SD; IOP and CDR reported as median (range)

| **Category** | **Total**  **(n = 192)** | **Did Not Need Urgent Surgery (n = 149)** | **Needed Urgent Surgery**  **(n = 43)** | **P-value** |
| --- | --- | --- | --- | --- |
|  |  |  |  |  |
| **Demographics** | | | | |
| Age | 60.5 15.8 | 60.4 17.1 | 60.7 10.6 | 0.957 |
| % Female | 102 (53.1%) | 79 (53.0%) | 23 (53.5%) | 1.000 |
| ADI (national percentile) | 59.4 26.9 | 59.7 26.9 | 59.3 27.0 | 0.937 |
| New Diagnosis at Wills | 76 (39.6%) | 48 (32.2%) | 28 (65.1%) | **0.046** |
|  |  |  |  |  |
| **Race/Ethnicity: n(%)** | | | | |
| Black | 85 (44.3%) | 74 (49.7%) | 11 (25.6%) | **0.019** |
| White | 59 (30.7%) | 40 (26.8%) | 19 (44.2%) |
| Hispanic | 22 (11.5%) | 17 (9.4%) | 5 (11.6%) |
| Asian | 14 (7.3%) | 8 (5.4%) | 6 (14.0%) |
| Unspecified | 12 (6.2%) | 10 (6.7%) | 2 (4.7%) |
|  |  |  |  |  |
| **Clinical Characteristics on ER Exam** | | | | |
| VA worse eye | 1.31 1.05 | 1.26 1.07 | 1.46 1.00 | 0.149 |
| VA better eye | 0.35 0.53 | 0.33 0.54 | 0.40 0.50 | 0.216 |
| IOP worse eye | 28.5 (3-87) | 37 (8-87) | 28 (3-74) | 0.053 |
| IOP better eye | 20 (6-68) | 16 (9-59) | 20 (6-68) | **0.031** |
| CDR worse eye | 0.8 (0.1-1.0) | 0.38 (0.20-1.0) | 0.85 (0.10-1.0) | **0.028** |
| CDR better eye | 0.6 (0.1-1.0) | 0.38 (0.10-0.80) | 0.70 (0.10-1.0) | **<0.001** |
| Any Visual Impairment | 55 (28.6%) | 36 (65.4%) | 19 (34.5%) | **0.037** |
| Unilateral or Bilateral Blindness | 92 (47.9%) | 64 (69.6%) | 28 (30.4%) | **0.032** |
|  |  |  |  |  |
| **Low Vision: n(%)** | | | | |
| No Low Vision | 135 (70.3%) | 111 (74.5%) | 24 (55.8%) | 0.215 |
| BCVA < 20/40 | 18 (9.4%) | 12 (8.1%) | 6 (14%) |
| BCVA < 20/60 | 25 (13%) | 16 (10.7) | 9 (20.9%) |
| BCVA < 20/200 | 14 (7.3%) | 10 (6.7%) | 4 (9.3%) |
|  |  |  |  |  |
| **Blindness: n(%)** | | | | |
| No blindness | 100 (52.1%) | 85 (5.7%) | 15 (34.9%) | 0.098 |
| 1 eye < 20/200 | 78 (40.6%) | 54 (28.1%) | 24 (55.8%) |
| Both eyes < 20/200 | 14 (7.3%) | 10 (6.7%) | 4 (9.3%) |

ER: emergency room; RUCA: rural urban commuting area; ADI: area deprivation index;

VA: visual acuity; IOP: intraocular pressure; CDR: cup-to-disc ratio; BCVA: best corrected visual acuity
